# Supplementary material for: Identification of novel non-canonical RNA-binding sites in Gemin5 involved in internal initiation of translation
Source: PubMed Central journal article supplement — Nucleic Acids Res. 2014 Mar 5;42(9):5742–54. doi: 10.1093/nar/gku177 (PMC4027194; doi:10.1093/nar/gku177), 2014-03-05
Supplement: supp_gku177_nar-00103-r-2014-File010.pdf [file supp_gku177_nar-00103-r-2014-File010.pdf]

## SUPPLEMENTARY INFORMATION

**Figure S1.** HSQC spectrum of a  $^1\text{H}$ - $^{15}\text{N}$ -labelled Gemin5-np domain (blue) in 50 mM Phosphate buffer with 150 mM NaCl, pH 6.7, acquired in a 600 MHz spectrometer. About ~80% of the signals corresponding to the domain are defined in the spectrum, precluding the unambiguous assignment of all resonances. However, based on the assignment of the sequence using standard backbone triple resonance experiments and on the dispersion of the NMR signals shown in the spectrum, we conclude that the construct investigated has a short helical conformation surrounded by unstructured regions, yielding the ensemble of flexible conformations observed in 2D and 3D NOESY experiments. The presence of these elements of secondary structure is in agreement with the secondary structure prediction, which it is represented in Figure 2B.

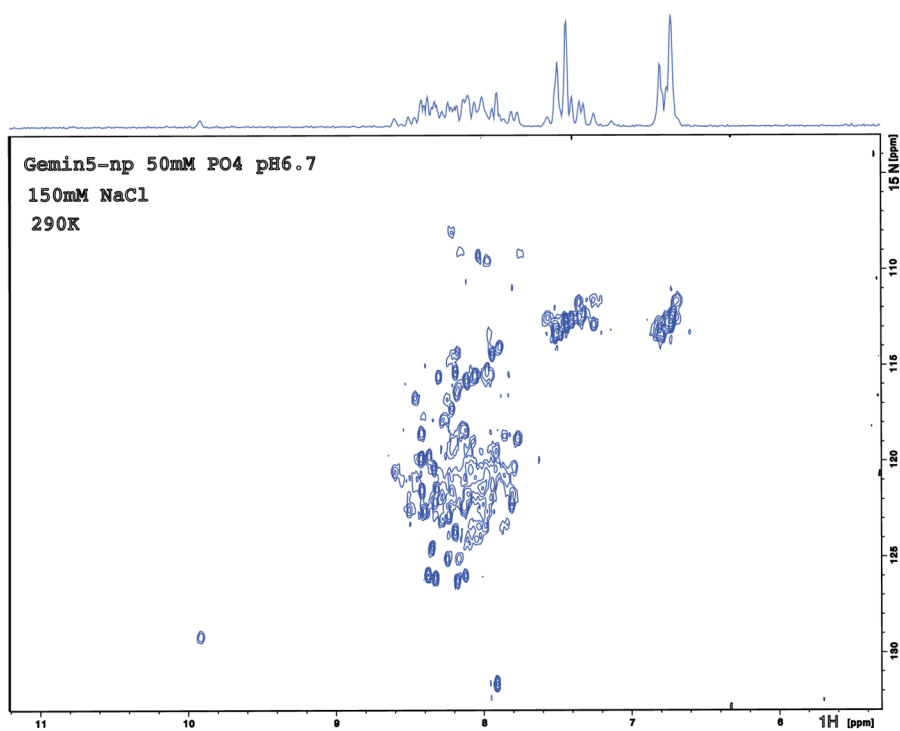

**Figure S2. Depletion of Gemin5 in HEK293 cells.** (A) Western blot analysis of HEK293 cell extracts transfected with increasing concentrations (25 to 100 nM) of three different siRNAs (G5.1, G2.2 and G5.3) targeted to Gemin5 or a control siRNA with no target sequence in mammalian mRNAs. Cell extracts were collected 48 and 72 h post-transfection. Tubulin was used as loading control. (B) The effectiveness of depletion for each G5 siRNA (dark grey, light grey, or white shaded bars), relative to the control siRNA (black bars), is represented in a histogram. (C) The effect on luciferase expression following transfection of a bicistronic construct in siG5.3 transfected cells is shown on the bottom panel.

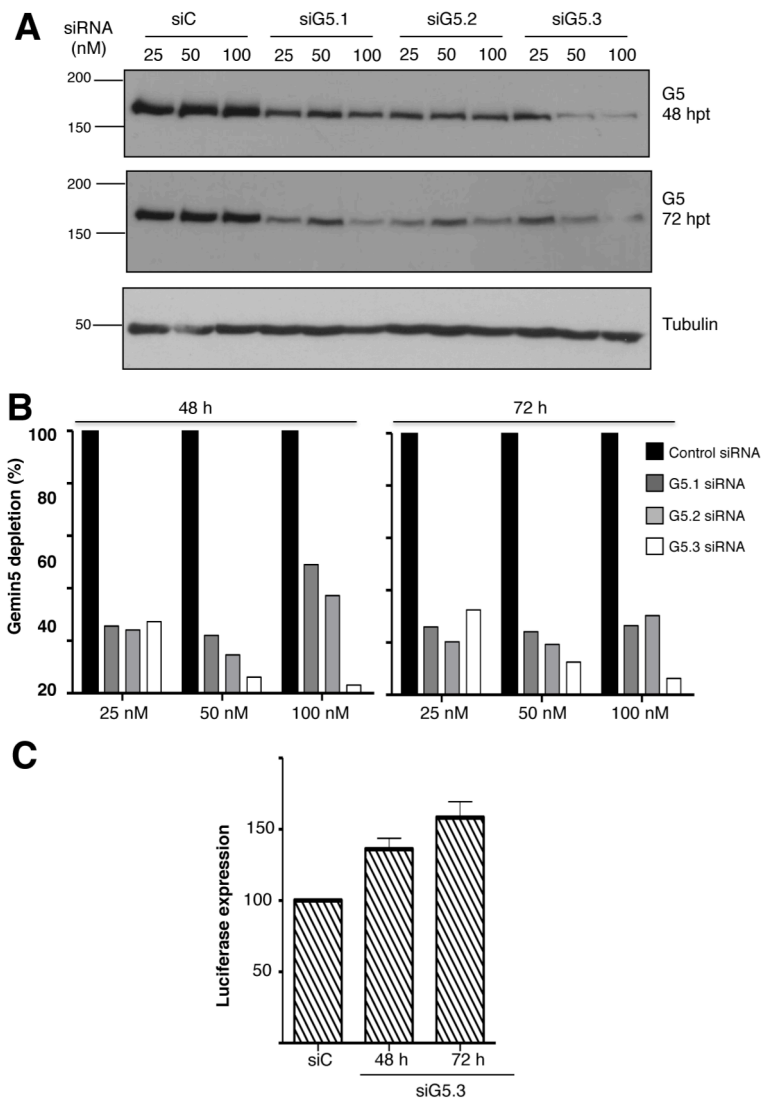

**Figure S3. Effect of Gemin5 truncated polypeptides expression on cap-dependent translation.** G5-depleted cells were transfected with increasing amounts of the indicated G5 truncated constructs and the bicistronic pBIC. Cap-dependent translation was monitor by CAT activity, relative to the values observed in control siRNA treated cells (empty bars). Black bars depict the effect of Gemin5 silencing on cap-dependent translation, while striped bars depict the values of CAT activity observed in G5 constructs transfected cells.

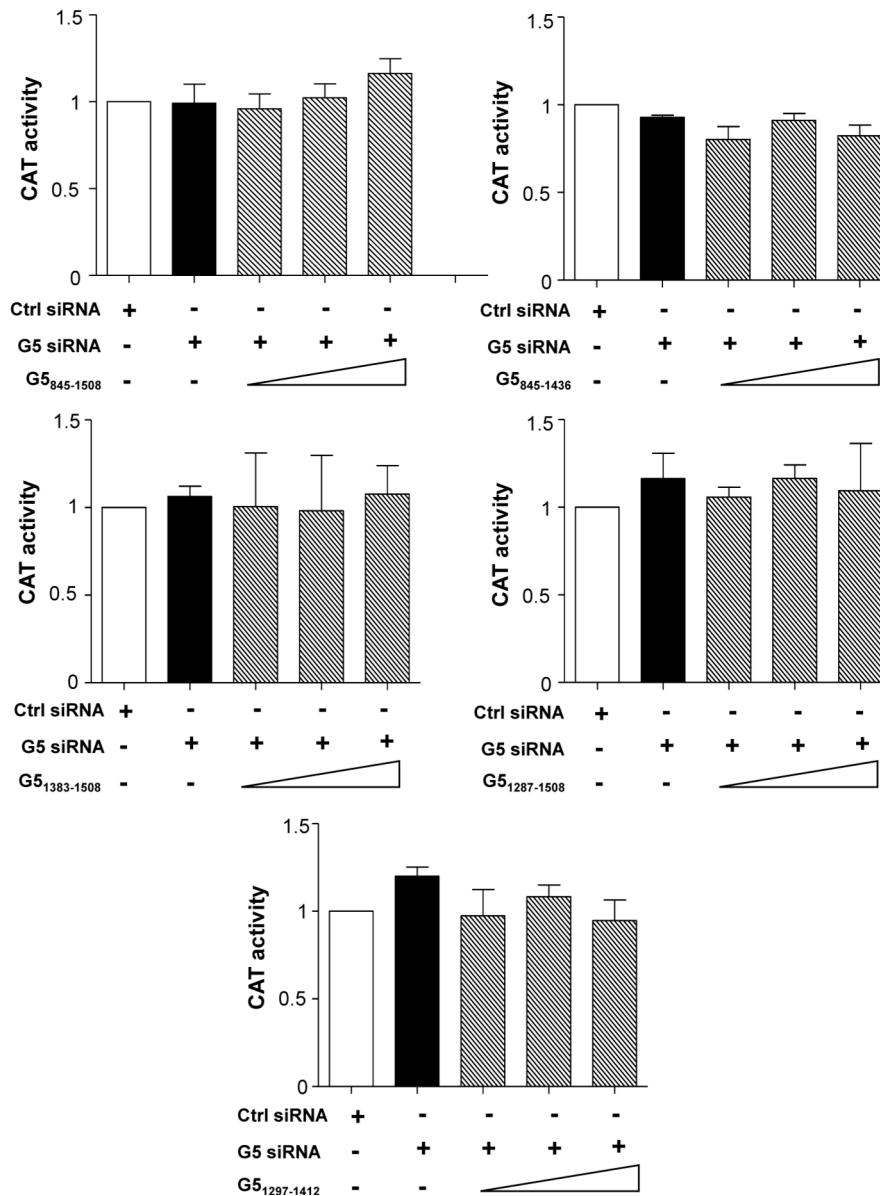

**Figure S4. The C-terminal region of Gemin5 represses IRES-dependent translation in vitro.** Construct pG5<sub>1383-1508</sub> was created with primers J1s/15as using as template pG5<sub>1287-1508</sub> and inserted into pGEM3 via KpnI-XbaI. Transcript G5<sub>1383-1508</sub> (0.1–5 pmol) synthesized *in vitro* was translated in 70% rabbit reticulocyte lysate (RRL) (Promega) supplemented with <sup>35</sup>S-methionine (10 μCi) 15 min prior to addition of the bicistronic RNA (200 ng) bearing the FMDV IRES between CAT and luciferase. <sup>35</sup>S-labeled proteins were resolved in SDS-PAGE followed by autoradiography of dry gels. The intensity of <sup>35</sup>S-labeled luciferase (squares) (IRES-dependent translation) and chloramphenicol acetyl transferase (CAT) (triangles) (5′-end dependent translation) proteins was measured in a densitometer. Values represent the mean (±SD) of three experiments normalized to the lane without G5 RNA.

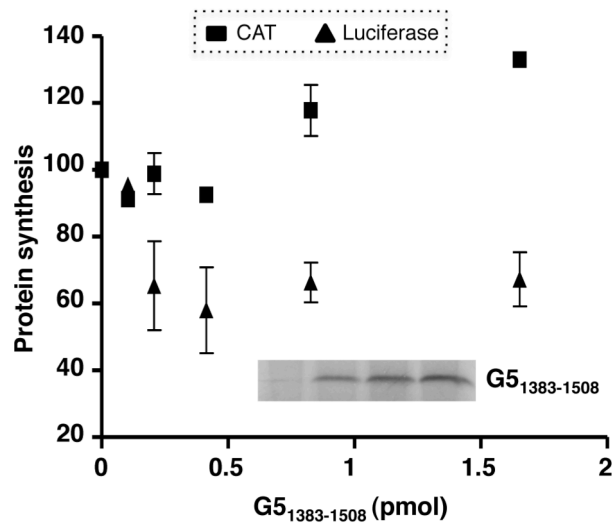

**Figure S5.** UV-crosslinking assay conducted with increasing amounts of the deletion His-tagged G5<sub>Δ1365-1394</sub> and radiolabeled domain 5, fractionated in SDS-PAGE and visualized by autoradiography. The mobility of the protein detected by WB using anti-Gemin5 of the purified protein is shown on the right. Mobility of MW markers is indicated at the left.

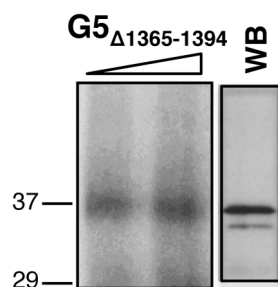

**Table S1. Oligonucleotides**

| <b>Primer</b> | <b>Nucleotide sequence (5'-3')</b> | <b>Construct</b>                     |
|---------------|------------------------------------|--------------------------------------|
| G5-1s         | GGATCCCGCTCGTTCCTTG                | pcDNAXpressG5 <sub>845-1508</sub>    |
| G5-2as        | CCACCAGAATTCATACAGAC               | pcDNAXpressG5 <sub>845-1508</sub>    |
| G5-3s         | GCTTGGTACCAATGATCCGACAACACC        | pcDNAXpressG5 <sub>1383-1508</sub>   |
| G5-4as        | CTCTAGAGGATCCCCGGGTCACATAC         | pcDNAXpressG5 <sub>1383-1508</sub>   |
| G5-5s         | GGATCCCTGGTGGTCTCTCTC              | pcDNA3XpressG5 <sub>1287-1508</sub>  |
| G5-6as        | TCTAGATCACATACAGAAGGTCTG           | pcDNA3XpressG5 <sub>1287-1508</sub>  |
| G5-7s         | GGTACCGCCAAATTCCAGTGTCTGGG         | pcDNA3Xpress-G5 <sub>1297-1412</sub> |
| G5-8as        | TTACTGCTCTGCTTCTACTTCC             | pcDNA3Xpress-G5 <sub>1297-1412</sub> |
| G5-9s         | CATATGGCTCGTTCCTTGCTTCCCC          | pET28aG5 <sub>845-1436</sub>         |
| G5-10as       | CCACCAGAATTCATACAGAC               | pET28aG5 <sub>845-1436</sub>         |
| G5-11s        | TGAATTCTGGTGGTCTCTCTC              | pET28aG5 <sub>845-1436</sub>         |
| G5-12as       | GCTAAGCTTCATTTGGTTAACTCAGG         | pET28aG5 <sub>845-1436</sub>         |
| G5-13s        | GGGGAATTCTGGTGGTCTCTC              | pET28aG5 <sub>1287-1508</sub>        |
| G5-14as       | TTGCTCGAGTCACATACAGAAGGTCTGGCAGTG  | pET-28aG5 <sub>1287-1508</sub>       |
| G5-15s        | CGCATGCACTCTGTAAATCCAC             | pRSETB-G5 <sub>Δ1365-1394</sub>      |
| G5-16as       | GAAGCTTGATGATGACCGGTAC             | pRSETB-G5 <sub>Δ1365-1394</sub>      |
| G5-17s        | AAGGTACCATGCGGGTTCTCATC            | pYES2-G5 <sub>845-1508</sub>         |
| G5-18as       | AAGCGCCGCTCACATACAGAAGGTCTGGC      | pYES2-G5 <sub>845-1508</sub>         |
| G5-19s        | GGCGGTACCATGATCCGACAACACC          | pG5 <sub>1383-1508</sub>             |
| G5-20as       | GAACGCGGCTACAATTAATAC              | pG5 <sub>1383-1508</sub>             |
